# Supplementary material for: Phytoplankton trigger the production of cryptic metabolites in the marine actinobacterium Salinispora tropica
Source: PubMed Central journal article supplement (PMC7888443; doi:10.1111/1751-7915.13722), 2020-12-05
Supplement: MBT2-14-291-s001.pdf [file MBT2-14-291-s001.pdf]

## **Phytoplankton trigger the production of cryptic metabolites in the marine actinobacterium *Salinispora tropica*.**

Audam Chhun<sup>1,#</sup>, Despoina Sousoni<sup>1</sup>, Maria del Mar Aguiló-Ferretjans<sup>2</sup>, Lijiang Song<sup>3</sup>, Christophe Corre<sup>1,3,#</sup>, Joseph A. Christie-Oleza<sup>1,2,4,#</sup>

<sup>1</sup>School of Life Sciences, University of Warwick, Coventry, UK

<sup>2</sup>University of the Balearic Islands, Palma, Spain

<sup>3</sup>Department of Chemistry, University of Warwick, Coventry, UK

<sup>4</sup>IMEDEA (CSIC-UIB), Esporles, Spain

#Corresponding authors: [a.chhun@warwick.ac.uk](mailto:a.chhun@warwick.ac.uk), [c.corre@warwick.ac.uk](mailto:c.corre@warwick.ac.uk) and [joseph.christie@uib.eu](mailto:joseph.christie@uib.eu)

---

## **Supplementary Figures**

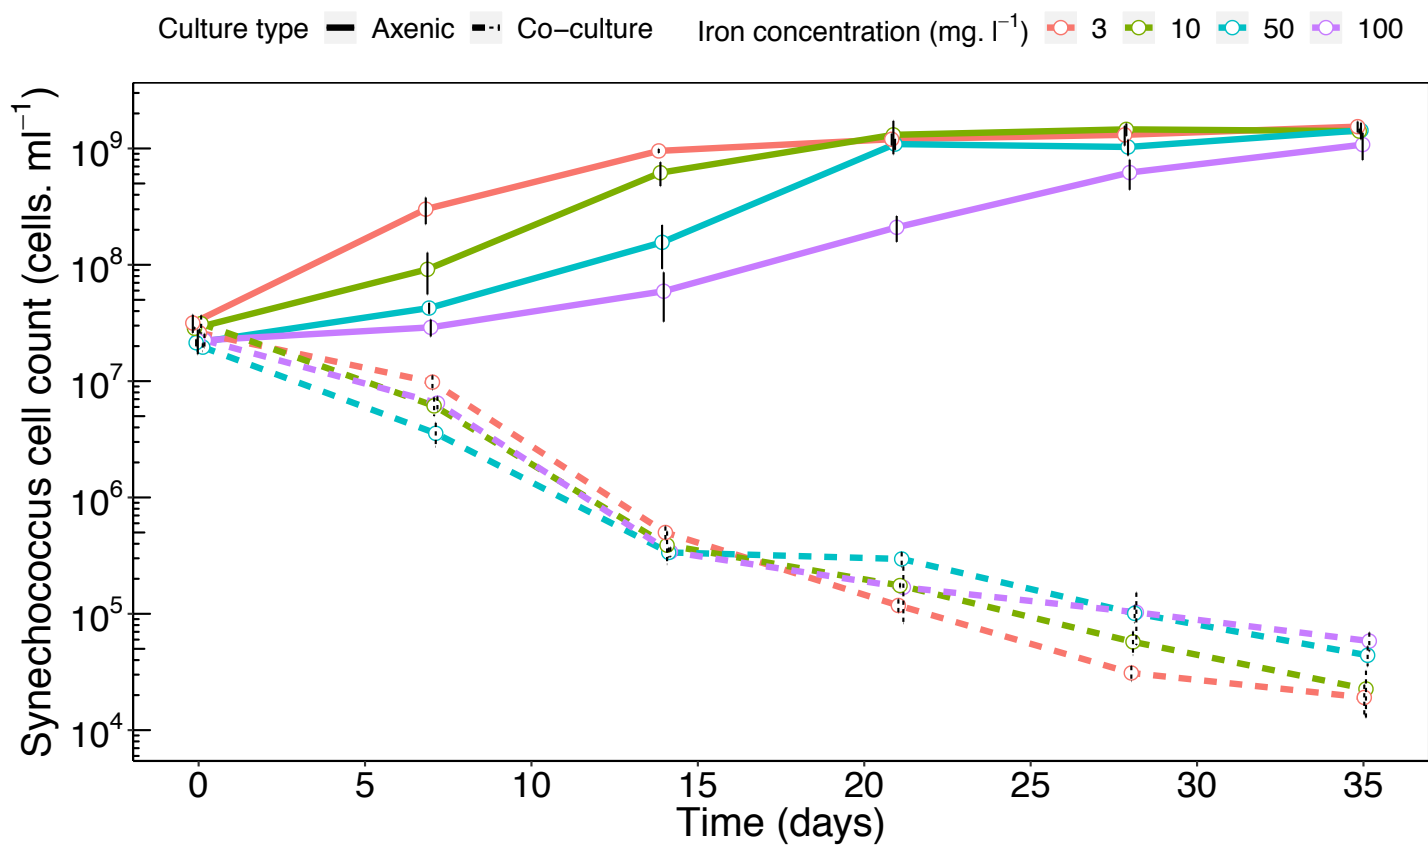

**Supplementary Figure S1 | *Synechococcus* inhibition by *S. tropica* is not mediated by iron depletion.** Monitoring of *Synechococcus* population grown axenically or in co-culture with *S. tropica*, in media supplemented with 3, 10, 50 or 100 mg l<sup>-1</sup> Fe(III). Graph shows mean ± standard deviation of three biological replicates.

**Supplementary Table S1 | Molecular ions detected by LC-MS in *S. tropica*-*Synechococcus* co-culture only.** Table shows molecular ions detected by high-resolution LC/(+)ESI-MS. Peak numbering is based on HPLC retention time and colors indicate groups of related compounds. Observed  $m/z$  values and predicted chemical formulae for  $[M+H]^+$  are provided. Observed mass of main ions obtained after MS2 fragmentation are given.

| MS Peak  | Observed $m/z$ | Chemical formulae for $[M+H]^+$<br>(calculated $m/z$ ; err [ppm]) | MS/MS                |
|----------|----------------|-------------------------------------------------------------------|----------------------|
| <b>1</b> | 399.2135       | $[C_{19}H_{31}N_2O_7]^+$<br>(399.2126; -2.4)                      | <b>296.1498</b>      |
|          |                |                                                                   | 271.1295             |
|          |                |                                                                   | 186.0765             |
|          |                |                                                                   | 168.0659             |
| <b>2</b> | 401.2294       | $[C_{19}H_{33}N_2O_7]^+$<br>(401.2292; -2.8)                      | <b>298.1657</b>      |
|          |                |                                                                   | 273.1453             |
|          |                |                                                                   | 255.1348             |
|          |                |                                                                   | 152.0712             |
| 3        | 438.1701       | $[C_{28}H_{24}NO_4]^+$<br>(438.1700; -0.3)                        | 194.0817<br>177.1279 |
| <b>4</b> | 464.2509       | $[C_{22}H_{34}N_5O_6]^+$<br>(464.2504; -1.2)                      | <b>276.16</b>        |
|          |                |                                                                   | 171.088              |
|          |                |                                                                   | 154.0615             |
| <b>5</b> | 296.1499       | $[C_{15}H_{22}NO_5]^+$<br>(296.1492; -2.1)                        | 296.1499             |
|          |                |                                                                   | 318.132              |
|          |                |                                                                   | 168.066              |
| <b>6</b> | 435.2609       | $[C_{22}H_{35}N_4O_5]^+$<br>(435.2602; -1.7)                      | 372.229              |
|          |                |                                                                   | <b>276.1599</b>      |
|          |                |                                                                   | 142.0979             |
| <b>7</b> | 449.2764       | $[C_{23}H_{37}N_4O_5]^+$<br>(449.2758; -1.3)                      | 156.1135             |
| <b>8</b> | 298.1653       | $[C_{15}H_{24}NO_5]^+$<br>(298.1649; -1.5)                        | 320.1447             |
|          |                |                                                                   | 298.1654             |
|          |                |                                                                   | 170.0815             |

### Salinosporamide A (Marizomib)

Chemical Formula:  $C_{15}H_{20}ClNO_4$   
Exact Mass: 313.1081

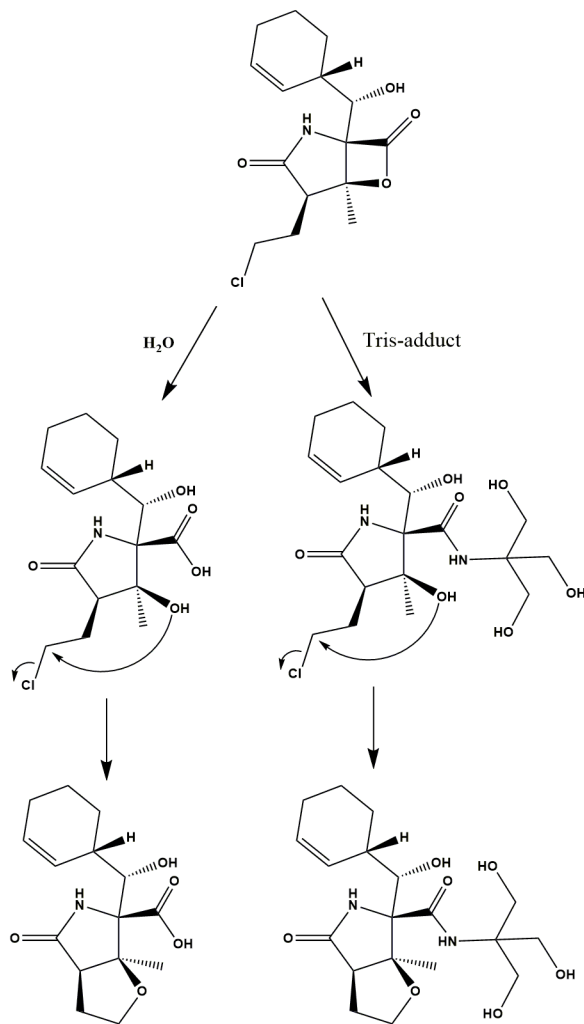

**Compound 5**

Chemical Formula:  $C_{15}H_{21}NO_5$   
Exact Mass: 295.1420

**Compound 1**

Chemical Formula:  $C_{19}H_{30}N_2O_7$   
Exact Mass: 398.2053

### Salinosporamide B

Chemical Formula:  $C_{15}H_{21}NO_4$   
Exact Mass: 279.1471

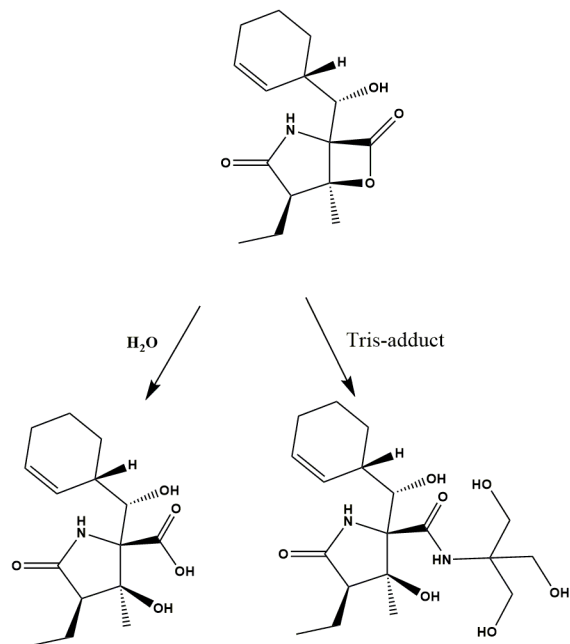

**Compound 8**

Chemical Formula:  $C_{15}H_{23}NO_5$   
Exact Mass: 297.1576

**Compound 2**

Chemical Formula:  $C_{19}H_{32}N_2O_7$   
Exact Mass: 400.2210

**Supplementary Figure S2 | Chemical structure of salinosporamide A and B, with their respective degradation products.** Salinosporamide A ( $C_{15}H_{20}^{35}ClNO_4$ ; mass 313.11) hydrolyzes to form the molecule NPI-0065 (**5**) ( $C_{15}H_{21}NO_5$ ; mass 295.14) or reacts with Tris to form the hypothetical molecule (**1**) ( $C_{19}H_{30}N_2O_7$ ; mass 398.21). Salinosporamide B ( $C_{15}H_{21}NO_4$ ; mass 279.15) hydrolyzes to form the molecule (**8**) ( $C_{15}H_{23}NO_5$ ; mass 297.16) or reacts with Tris to form the hypothetical molecule (**2**) ( $C_{19}H_{32}N_2O_7$ ; mass 400.22).

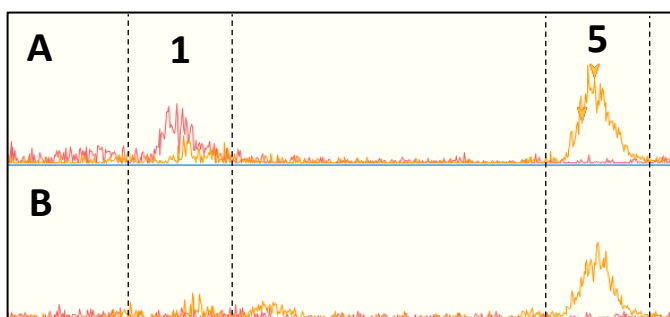

**Supplementary Figure S3 | Extracted Ion chromatograms of molecules 1 and 5 in the supernatant of *S. tropica* cultures in marine broth. A.** Culture supernatant of *S. tropica* grown in marine broth supplemented with trizma base. **B.** Culture supernatant of *S. tropica* grown in marine broth. Graphs show molecules detected with a retention time between 8.8 and 11.1 minutes. In red is shown the extracted ion chromatogram for  $m/z$  399 ( $\pm$  0.5). In orange is shown the extracted ion chromatogram for  $m/z$  296 ( $\pm$  0.5).

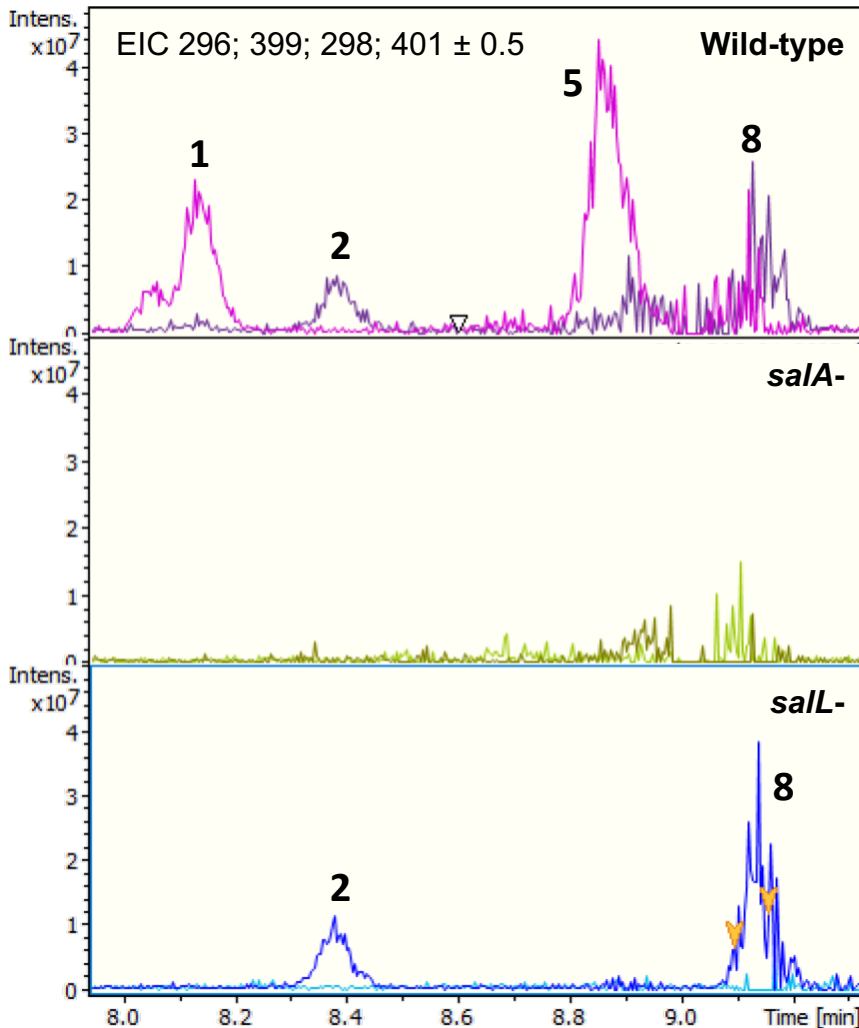

**Supplementary Figure S4 |** Extracted ion chromatograms of molecules 1, 2, 5 and 8 in the culture supernatant of *S. tropica* wild-type (top panel), and the salinosporamide mutants *saIA*<sup>-</sup> (middle panel) and *saII*<sup>-</sup> (bottom panel). The *saIA*<sup>-</sup> strain does not produce salinosporamide A or any derivatives, while the *saII*<sup>-</sup> strain still produces salinosporamide B. Graphs show molecules detected with a retention time between 8.0 and 9.4 minutes.

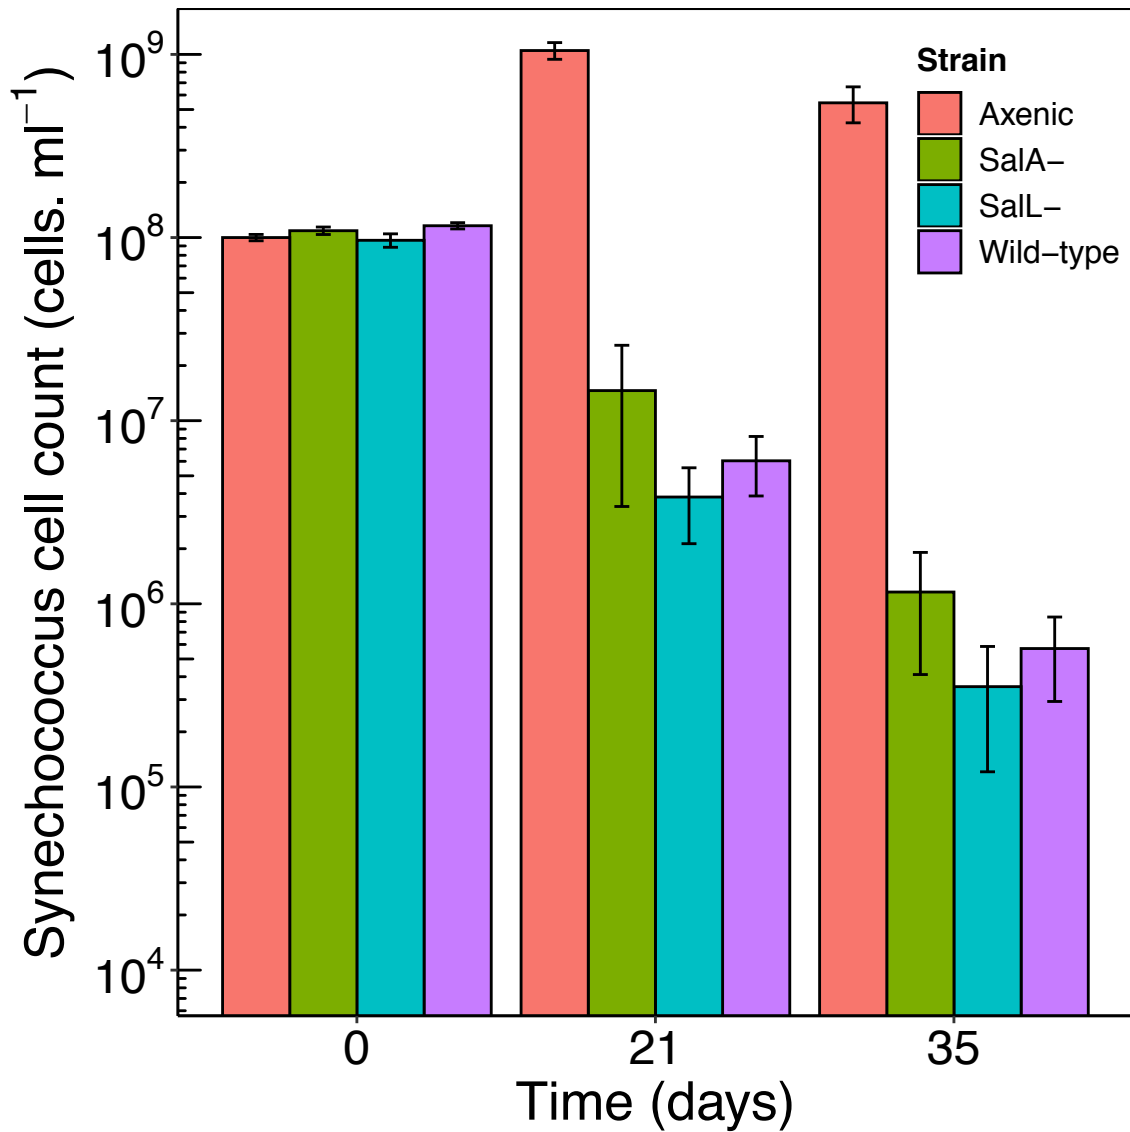

Supplementary Figure S5 | Monitoring of *Synechococcus* grown in axenic culture and in co-culture with the wild-type, *salA*- or *sall*- *S. tropica* strains. Graph shows mean of triplicates ± standard deviation.

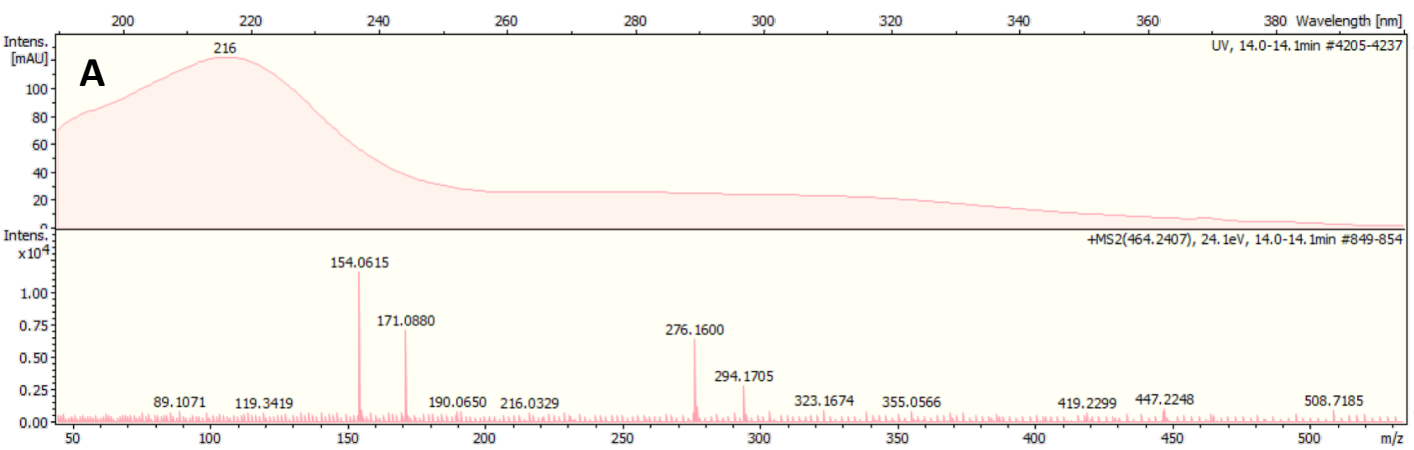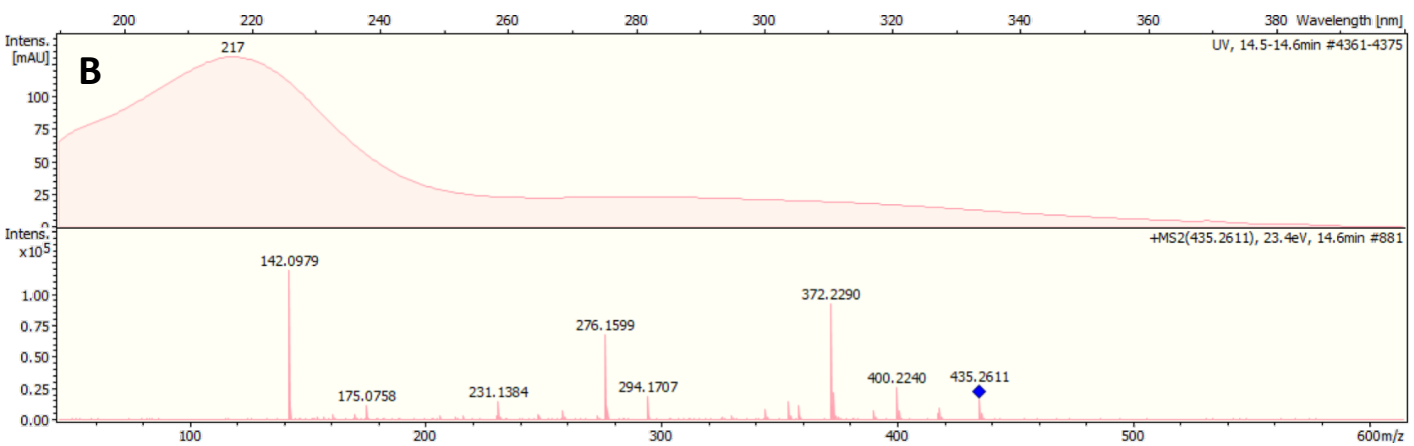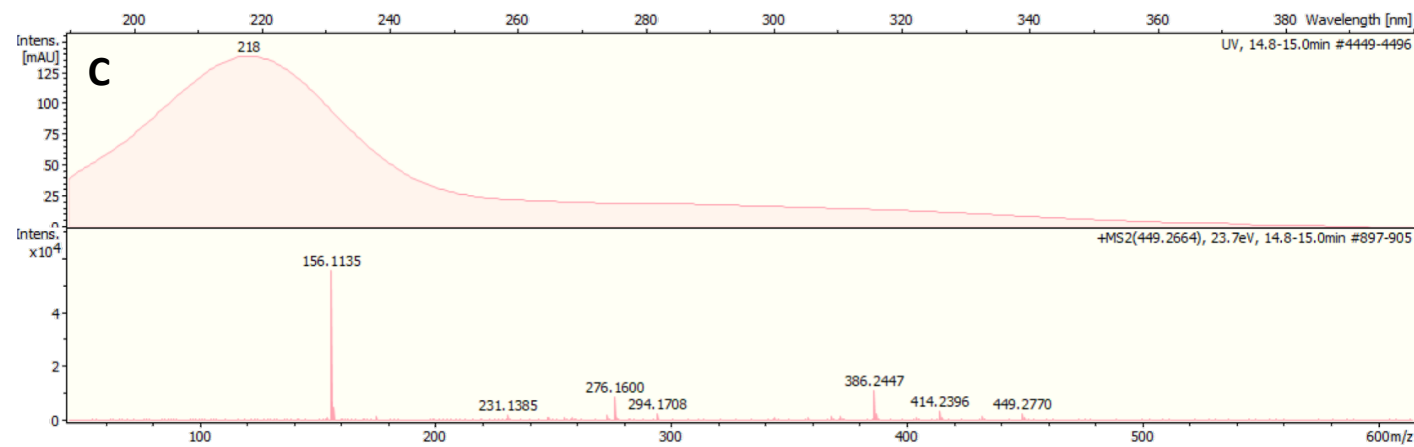

**Supplementary Figure S6 | MS/MS fragmentation spectra of the cryptic molecules. High-resolution LC/(+)ESI-MS/MS spectra obtained for molecule 4 (A), 6 (B), and 7 (C).**



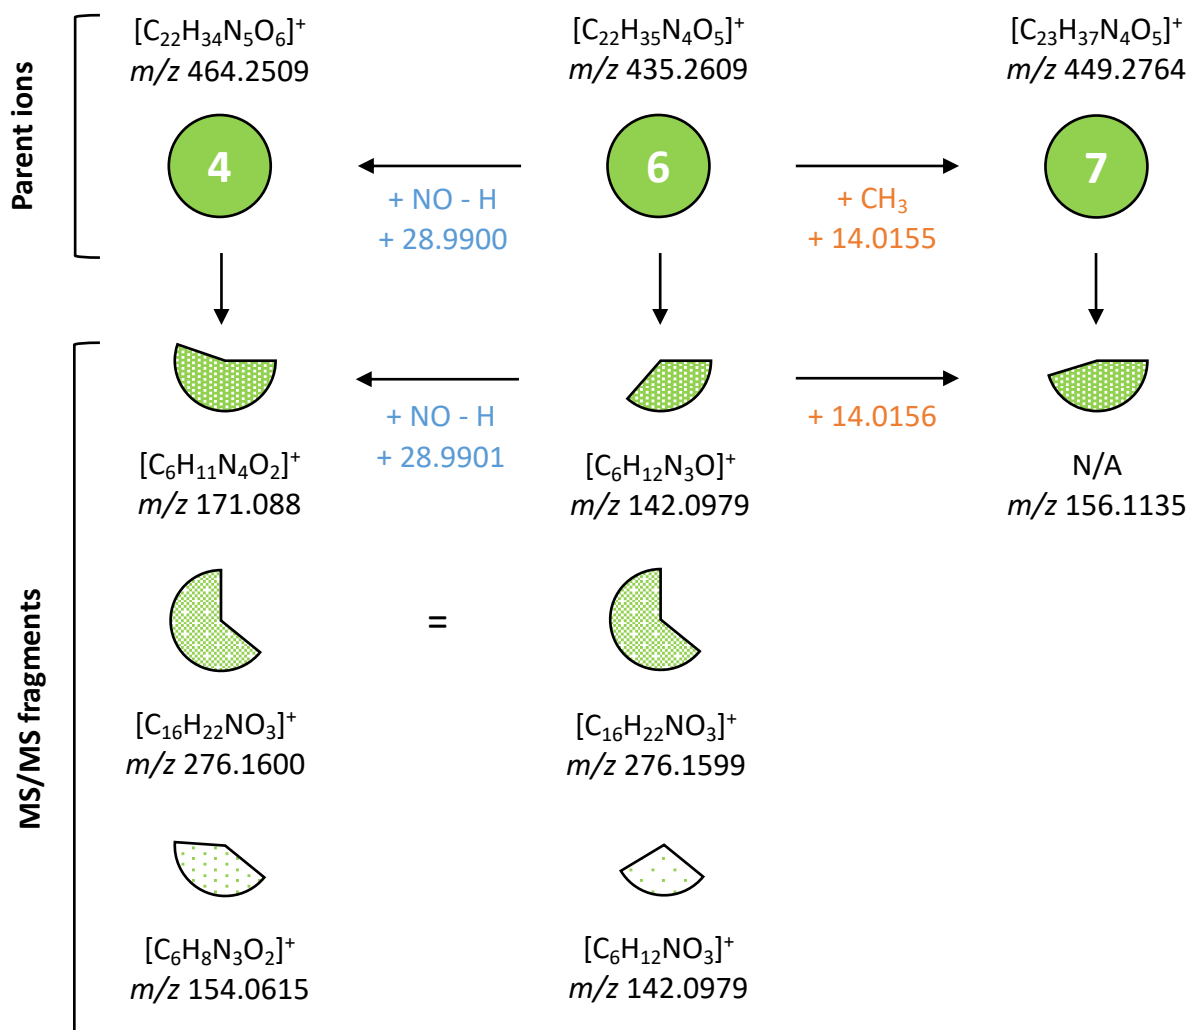

**Supplementary Figure S7 | The cryptic molecules 4, 6 and 7 are related.** Schematic of the cryptic compounds and their corresponding daughter ions generated by MS/MS. Observed  $m/z$  values detected by high-resolution LC/(+)-ESI-MS and predicted chemical formulae for  $[M+H]^+$  are provided. N/A indicate chemical formulae that could not be generated by the DataAnalysis software.

**Supplementary Table S2 | Summary of the proteomics dataset.**

| Strain studied<br>(No. of proteins)  | Growth medium                      | Detected proteins<br>(% of total proteins) | Detected proteins related to BGCs<br>(% of total detected) | Relative abundance <sup>a</sup><br>(%) |
|--------------------------------------|------------------------------------|--------------------------------------------|------------------------------------------------------------|----------------------------------------|
| <i>S. tropica</i> CNB-440<br>(4,522) | Marine Broth<br>(MB)               | 1,869 (41.3)                               | 179 (9.6)                                                  | 9.6 ± 0.9                              |
|                                      | Artificial Seawater<br>(ASW)       | 1,797 (39.7)                               | 172 (9.6)                                                  | 11.4 ± 0.4                             |
|                                      | Phototroph supernatant<br>(SUPSYN) | 1,831 (40.5)                               | 181 (9.9)                                                  | 15.0 ± 1.2                             |

\*\*\*  
\*\*

<sup>a</sup> Table shows the cumulated relative abundance of the detected proteins linked to biosynthetic gene clusters, indicated as mean ± standard deviation of three biological replicates. Tukey HSD test, \*\* significant at  $q$ -value < 0.01; \*\*\* significant at  $q$ -value < 0.001.

**Supplementary Table S3 | Detected proteins from the *pks3* orphan BGC in *S. tropica* CNB-440.** Table shows protein identifiers, annotation and relative abundance (expressed as the abundance of the protein over the abundance of the total proteome normalized to 1).

| Protein ID | Gene name  | Locus tag     | Annotation                                               | Relative abundance |
|------------|------------|---------------|----------------------------------------------------------|--------------------|
| A4X7T4     | Strop_2488 | STROP_RS12520 | DUF3050 domain-containing protein                        | 0.000750547        |
| A4X7T5     | Strop_2489 | STROP_RS12525 | phytanoyl-CoA dioxygenase                                | 0.130375917        |
| A4X7T6     | Strop_2490 | STROP_RS12530 | 4-hydroxyphenylpyruvate dioxygenase                      | 0.002402502        |
| A4X7T7     | Strop_2491 | STROP_RS12535 | beta-ketoacyl                                            | 0.001818263        |
| A4X7T8     | Strop_2492 | STROP_RS12540 | acyl--CoA ligase                                         | 0.031677582        |
| A4X7U0     | Strop_2494 | STROP_RS12550 | 3-ketoacyl-ACP synthase                                  | 0.014597734        |
| A4X7U3     | Strop_2497 | STROP_RS12570 | long-chain fatty acid--CoA ligase                        | 0.034956859        |
| A4X7U4     | Strop_2498 | STROP_RS12575 | antibiotic biosynthesis monooxygenase                    | 0.129801561        |
| A4X7U5     | Strop_2499 | STROP_RS12580 | actinorhodin polyketide beta-ketoacyl synthase           | 0.006074535        |
| A4X7U6     | Strop_2500 | STROP_RS12585 | beta-ketoacyl                                            | 0.00502919         |
| A4X7U7     | Strop_2501 | STROP_RS12590 | cupin domain-containing protein                          | 0.146326909        |
| A4X7U8     | Strop_2502 | STROP_RS12595 | cyclase                                                  | 0.495965212        |
| A4X7U9     | Strop_2503 | STROP_RS12600 | acetyl-CoA carboxylase biotin carboxylase subunit        | 0.006262552        |
| A4X7V0     | Strop_2504 | STROP_RS12605 | acetyl-CoA carboxylase biotin carboxyl carrier protein   | 0.10444248         |
| A4X7V1     | Strop_2505 | STROP_RS12610 | acetyl-CoA carboxylase carboxyltransferase subunit alpha | 0.000773389        |
| A4X7V2     | Strop_2506 | STROP_RS12615 | Tcml family type II polyketide cyclase                   | 0.117717019        |
| A4X7V4     | Strop_2508 | STROP_RS12625 | Tcml family type II polyketide cyclase                   | 0.229200995        |
